# Supplementary material for: Functions of LiBH4 in the hydrogen sorption reactions of the 2LiH–Mg(NH2)2 system
Source: Royal Society of Chemistry journal article supplement (doi:10.1039/c0dt00468e), 2010-01-01
Supplement: c0dt00468e.pdf [file c0dt00468e.pdf]

## Supporting Information

### Functions of LiBH<sub>4</sub> in the hydrogen sorption reactions of 2LiH- Mg(NH<sub>2</sub>)<sub>2</sub> system

Jianjiang Hu<sup>1</sup>, Eveline Weidner<sup>2</sup>, M. Hoelzel<sup>3</sup> and Maximilian Fichtner<sup>1</sup>

<sup>1</sup>Institute of Nanotechnology, Karlsruhe Institute of Technology, P.O. Box 3640, D-76021 Karlsruhe, Germany

<sup>2</sup>JRC Institute for Energy, Cleaner Energy Unit, Petten, the Netherlands

<sup>3</sup>Forschungs-Neutronequelle Heinz Maier-Leibnitz, Lichtenbergstrasse 1, 85747, Garching, Germany

#### Kissinger Plots for Mg(NH<sub>2</sub>)<sub>2</sub>-2LiH-0.3LiBH<sub>4</sub> and Mg(NH<sub>2</sub>)<sub>2</sub>-2LiH-0.67LiBH<sub>4</sub>

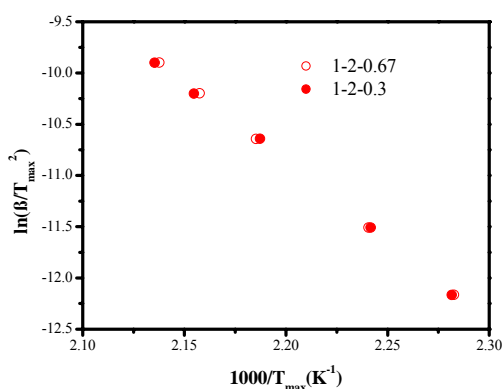

Figure S1 Kissinger Plots for Mg(NH<sub>2</sub>)<sub>2</sub>-2LiH-0.3LiBH<sub>4</sub> and Mg(NH<sub>2</sub>)<sub>2</sub>-2LiH-0.67LiBH<sub>4</sub>

#### Determination of transient activation energy

To determine the transient activation energy using the method described in the manuscript, dehydrogenation was performed at ramping rates  $\beta_1 = 2$  °C/min and  $\beta_2 = 5$  °C/min, respectively. In the time - conversion ( $t - \alpha$ ) (Figure S2) and temperature - conversion ( $T - \alpha$ ) (Figure S3) plots, the transient times ( $t_{1i}$  and  $t_{2i}$ ) and temperature ( $T_{1i}$  and  $T_{2i}$ ) at conversion  $\alpha_i$  can be obtained via equations (1) and (2), corresponding to ramping rates  $\beta_1$  and  $\beta_2$ , respectively. The transient Ea can be calculated through equation (3).

$$t_{lik} = \frac{t_{li} + t_{lk}}{2} \quad (l = 1, 2) \quad (1)$$

$$T_{lik} = \frac{T_{li} + T_{lk}}{2} \quad (l = 1, 2) \quad (2)$$

$$E_a = R \frac{T_{1ik} T_{2ik}}{T_{2ik} - T_{1ik}} \ln \frac{\Delta t_1}{\Delta t_2} \quad (3)$$

Where  $t_{li}$  and  $t_{lk}$  are times at the conversion degrees  $\alpha_i$  and  $\alpha_k$  for the heating rate  $\beta_l$ ;  $T_{li}$  and  $T_{lk}$  are the temperatures at the conversion degrees  $\alpha_i$  and  $\alpha_k$  for the heating rate  $\beta_l$ .  $t_{2i}$  and  $t_{2k}$  are times at the conversion degrees  $\alpha_i$  and  $\alpha_k$  for the heating rate  $\beta_2$ ;  $T_{2i}$  and  $T_{2k}$  are the temperatures at the conversion degrees  $\alpha_i$  and  $\alpha_k$  for the heating rate  $\beta_2$  ( $\beta_2 > \beta_1$ ). The calculated activation energy from equation (3) corresponds to the conversion at

$$\alpha = \frac{\alpha_i + \alpha_k}{2} \quad (4).$$

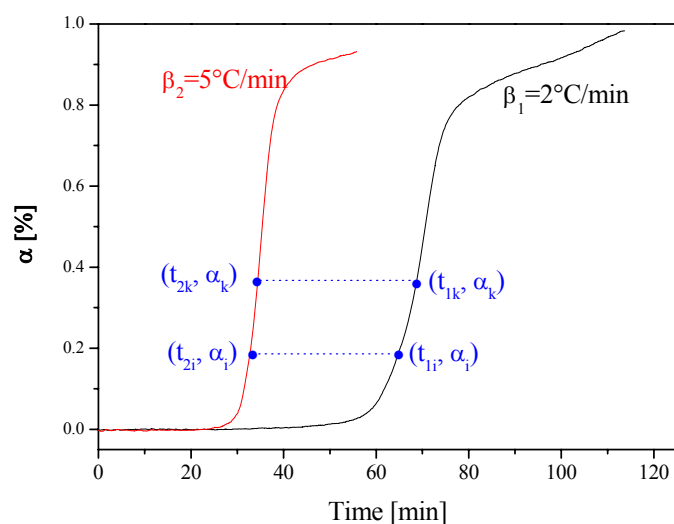

Figure S2 Conversion as a function of time at heating rates of  $\beta_1 = 2$  °C/min and  $\beta_2 = 5$  °C/min

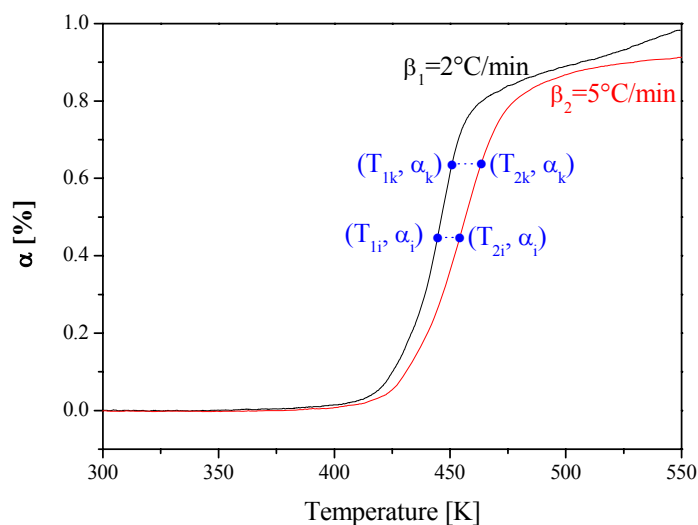

Figure S3 Conversion as a function of temperature at heating rates of  $\beta_1 = 2\text{ }^\circ\text{C/min}$  and  $\beta_2 = 5\text{ }^\circ\text{C/min}$

### Estimation of crystallinity of $\text{Mg}(\text{NH}_2)_2$ in $\text{LiBH}_4$ doped samples

Figure S4 shows the crystallization heat effect of  $\text{Mg}(\text{NH}_2)_2$  measured by DSC. Since the content of magnesium amide in the sample  $\text{Mg}(\text{NH}_2)_2\cdot 2\text{LiH}\cdot 0.3\text{LiBH}_4$  is 71.2 %, the crystallinity in this sample was estimated via the fraction of heat effect originated from the sample (-45.91 J/g as shown in Figure S4) divided by the crystallization enthalpy of  $\text{Mg}(\text{NH}_2)_2$  (-140.0 J/g):

$$45.91/140/71.2\% = 46.1\%$$

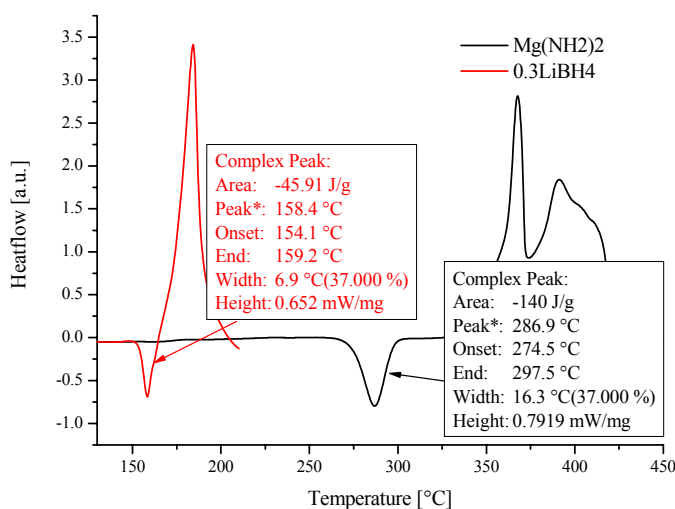

Figure S4 Crystallization enthalpies measured by DSC for pure  $\text{Mg}(\text{NH}_2)_2$  and mixture  $\text{Mg}(\text{NH}_2)_2\cdot 2\text{LiH}\cdot 0.3\text{LiBH}_4$

### Crystallization of $\text{Mg}(\text{NH}_2)_2$ from amorphous state

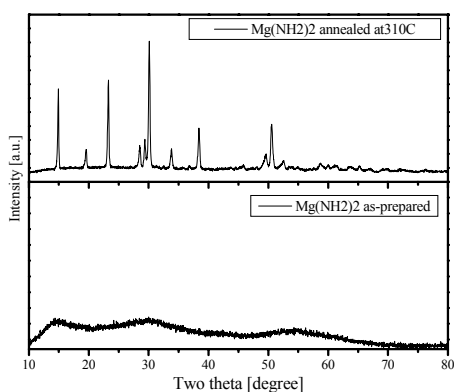

Fig. S5 XRD profiles of  $\text{Mg}(\text{NH}_2)_2$ : as-prepared by ball milling  $\text{MgH}_2$  with  $\text{NH}_3$  (lower) and annealed at 310 $^\circ\text{C}$

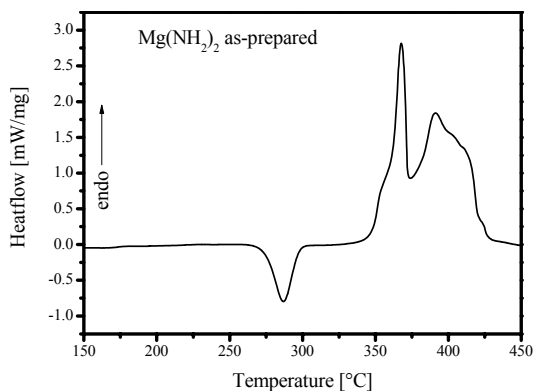

Fig. S6 DSC curve of as-prepared  $\text{Mg}(\text{NH}_2)_2$

### FTIR spectra at various desorption stages

Figures S7 and S8 are the FTIR spectra for samples  $\text{Mg}(\text{NH}_2)_2\cdot 2\text{LiH}\cdot 0.3\text{LiBH}_4$  and  $\text{Mg}(\text{NH}_2)_2\cdot 2\text{LiH}\cdot 0.67\text{LiBH}_4$ , respectively. It can be seen that the strong absorbance attributed to B-H stretching in the range  $2100 - 2400\text{ cm}^{-1}$  was not affected by different hydrogen desorption extent.

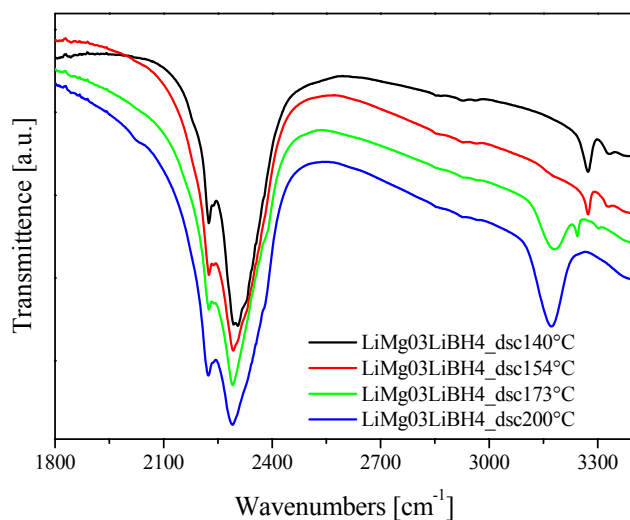

Figure S7 FTIR spectra of  $\text{Mg}(\text{NH}_2)_2\cdot 2\text{LiH}\cdot 0.3\text{LiBH}_4$  heated to 140°, 154°, 173° and 200 °C

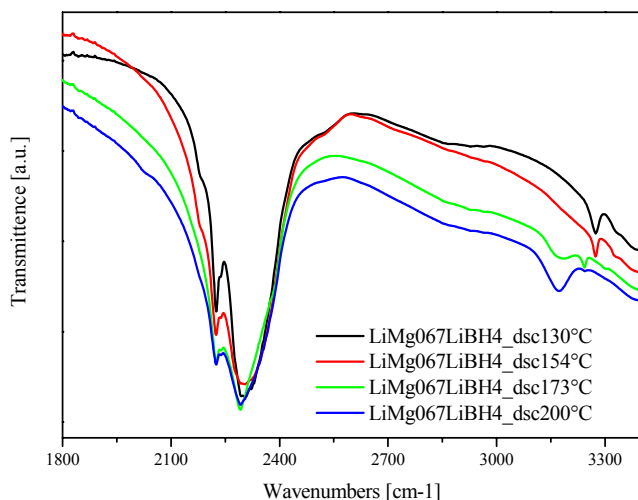

Figure S8 FTIR spectra of  $\text{Mg}(\text{NH}_2)_2\cdot 2\text{LiH}\cdot 0.67\text{LiBH}_4$  heated to 130 °, 154 °, 173 ° and 200 °C

### Preparation of $\text{Li}_4(^{11}\text{BD}_4)(\text{NH}_2)_3$ with high crystallinity

$\text{Li}_4(^{11}\text{BD}_4)(\text{NH}_2)_3$  melts at about 220 °C, as shown in Figure S9 (red curve). In order to obtain  $\text{Li}_4(^{11}\text{BD}_4)(\text{NH}_2)_3$  with high crystallinity, the ball milled mixture of  $\text{Li}^{11}\text{BD}_4$  with  $\text{LiNH}_2$  at 1:3 molar ratio was heated to 230 °C (just above its melting point) and kept at the temperature for 1 h, then cooled down slowly to room temperature. Figure S10 shows the strong diffraction intensity of annealed  $\text{Li}_4(^{11}\text{BD}_4)(\text{NH}_2)_3$ , compared to the as-milled product.

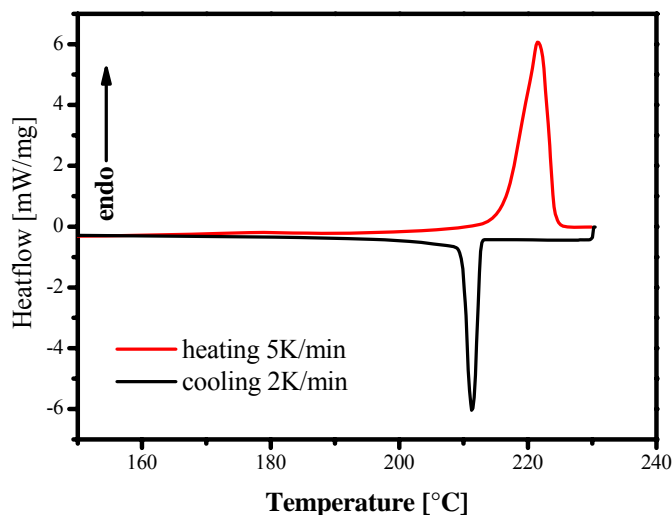

Figure S9 DSC curves of  $\text{Li}_4(^{11}\text{BD}_4)(\text{NH}_2)_3$  from milled mixture of  $\text{Li}^{11}\text{BD}_4$  with  $\text{LiNH}_2$  at 1:3 molar ratio.

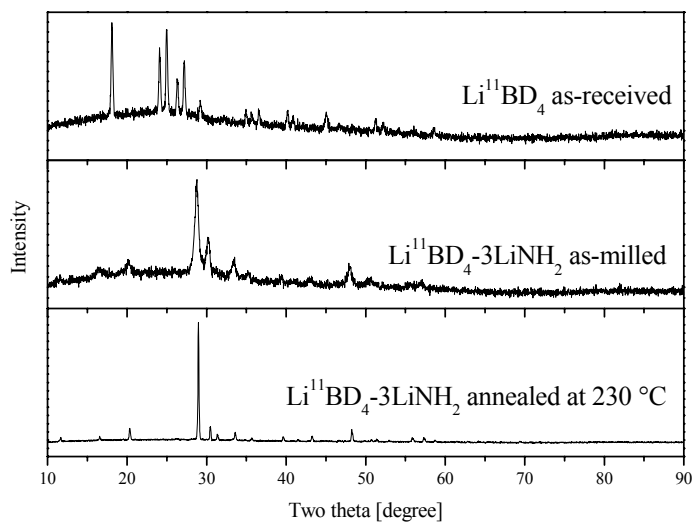

Figure S10 XRD patterns of Li<sup>11</sup>BD<sub>4</sub>, as-milled Li<sub>4</sub>(<sup>11</sup>BD<sub>4</sub>)(NH<sub>2</sub>)<sub>3</sub> and annealed Li<sub>4</sub>(<sup>11</sup>BD<sub>4</sub>)(NH<sub>2</sub>)<sub>3</sub>.
